# Supplementary material for: Genetic mechanisms in the repression of flowering by gibberellins in apple (Malus x domestica Borkh.)
Source: PubMed Central journal article supplement (PMC6796362; doi:10.1186/s12864-019-6090-6), 2019-10-16

# Transcription Factor

# Enriched motif

# Binding site

DEL1/2

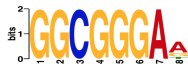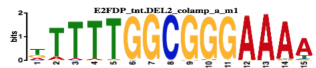

EIN3

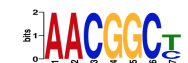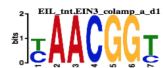

FUS3

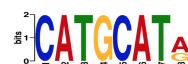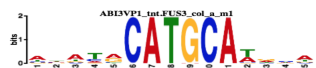

bZIP42/44

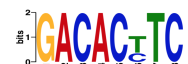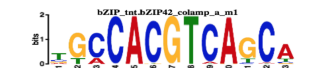

MYB1

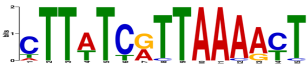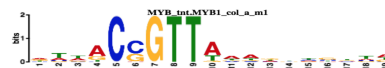

WRKY14

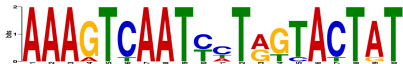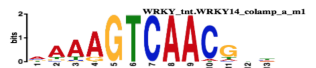

CDF3/5

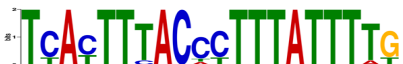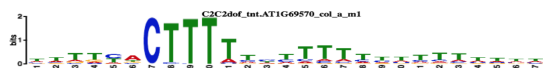

bZIP44/48

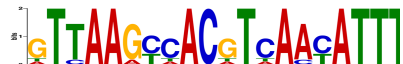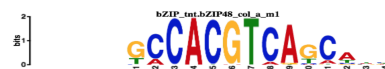

REM1

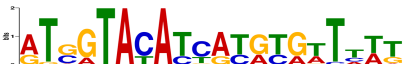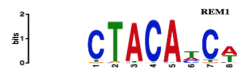

LIM1

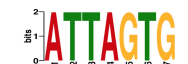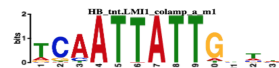

RVE

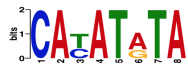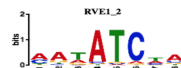

Supplement: 12864_2019_6090_MOESM15_ESM.pdf [file 12864_2019_6090_MOESM15_ESM.pdf]
