# Supplementary material for: Genetic mechanisms in the repression of flowering by gibberellins in apple (Malus x domestica Borkh.)
Source: PubMed Central journal article supplement (PMC6796362; doi:10.1186/s12864-019-6090-6), 2019-10-16

A

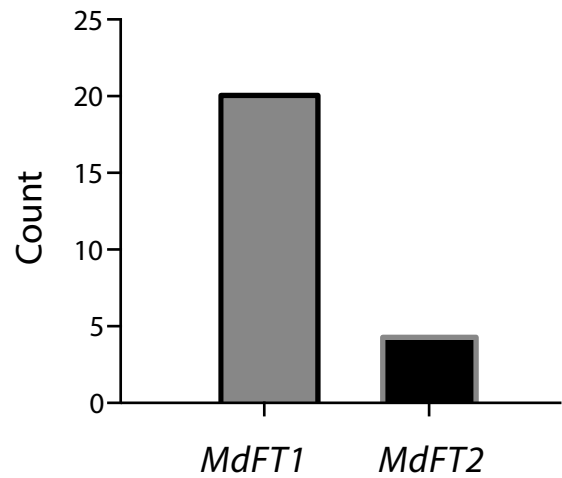

B

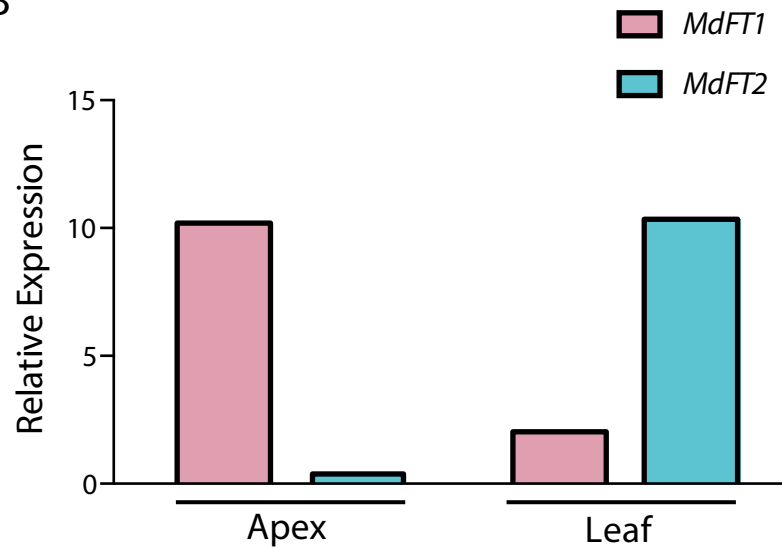

Supplement: 12864_2019_6090_MOESM11_ESM.pdf [file 12864_2019_6090_MOESM11_ESM.pdf]
